# Supplementary material
Source: MDPI journal article supplement (https://www.mdpi.com/2071-1050/14/12/7193)
Supplement: s1 [file s1]

# Supplementary Data

## Enhanced Nitrogen Removal in a Pilot-Scale Anoxic/Aerobic (A/O) Process Coupling PE Carrier and Nitrifying Bacteria PE Carrier: Performance and Microbial Shift

Shengbo Gu <sup>1,\*</sup>, Lebin Liu <sup>2</sup>, Xiaojie Zhuang <sup>1</sup>, Jinsheng Qiu <sup>1</sup> and Zhi Zhou <sup>3</sup>

<sup>1</sup> Power China Zhongnan Engineering Corporation Limited, Changsha 410014, China;

xjiezhuang@163.com (X.Z.); qiujs888@163.com (J.Q.)

<sup>2</sup> Beijing General Municipal Engineering Design and Research Institute Corporation Limited, Beijing 100082, China; liulb88@126.com

<sup>3</sup> School of Chemistry and Materials Science, Hunan Agricultural University, Changsha 410128, China; zhouzhi@hunau.edu.cn

\* Correspondence: shengbogu@163.com; Tel.: +86-0731-85072338

**Table S1** Characteristics of domestic wastewater for IFAS and A/O systems

| Experiment phase  | Inf NH <sub>4</sub> <sup>+</sup> -N | Inf NO <sub>2</sub> <sup>-</sup> -N | Inf NO <sub>3</sub> <sup>-</sup> -N | Inf COD    | Inf TN   |
|-------------------|-------------------------------------|-------------------------------------|-------------------------------------|------------|----------|
|                   | mg/L                                | mg/L                                | mg/L                                | mg/L       | mg/L     |
| Phase 0 (40 days) | 15.5±3.4                            | 0.1±0.1                             | 0.2±0.2                             | 119.2±29.3 | 20.2±3.4 |
| Period 1          | 14.7±3.9                            | 0.1±0.1                             | 0.2±0.1                             | 121.4±33.3 | 22.1±5.1 |
| Phase 1           | 16.7±5.3                            | 0.1±0.1                             | 0.7±0.2                             | 164.4±27.2 | 22.6±5.0 |
| (60 days)         | 13.7±2.9                            | 0.1±0.1                             | 0.5±0.2                             | 181.5±24.2 | 23.8±3.8 |
| Period 4          | 15.4±2.1                            | 0.1±0.1                             | 0.4±0.3                             | 139.7±52.0 | 23.3±6.9 |
| Period 5          | 17.9±4.9                            | 0.1±0.1                             | 0.5±0.2                             | 155.2±39.2 | 23.4±4.9 |
| Phase 2           | 15.9±2.5                            | 0.1±0.1                             | 0.8±0.2                             | 181.0±23.4 | 21.4±2.5 |
| (100 days)        | 16.1±4.1                            | 0.1±0.1                             | 0.6±0.3                             | 179.2±44.4 | 21.5±4.2 |
| Period 8          | 14.5±5.2                            | 0.1±0.1                             | 1.0±0.1                             | 142.1±46.4 | 19.1±4.8 |

**Table S2.** Characteristics of synthetic sludge digesting liquor for SBBR system.

| Experiment phase | Inf NH <sub>4</sub> <sup>+</sup> -N | Inf NO <sub>2</sub> <sup>-</sup> | Inf NO <sub>3</sub> <sup>-</sup> | Inf COD    | Inf pH  |
|------------------|-------------------------------------|----------------------------------|----------------------------------|------------|---------|
|                  | mg/L                                | N                                | N                                | mg/L       | /       |
|                  |                                     | mg/L                             | mg/L                             |            |         |
| 1-20 days        | 100                                 | 0.1±0.1                          | 0.2±0.1                          | 127.4±33.3 | 6.8-7.2 |
| 21-40 days       | 300                                 | 0.1±0.1                          | 0.7±0.2                          | 154.4±27.2 | 6.9-7.1 |
| 41-60 days       | 500                                 | 0.1±0.1                          | 0.5±0.2                          | 161.5±24.2 | 6.8-7.1 |
| 61-80 days       | 700                                 | 0.1±0.1                          | 0.4±0.3                          | 149.7±52.0 | 6.9-7.2 |
| 81-100 days      | 1000                                | 0.1±0.1                          | 0.6±0.4                          | 155.2±39.2 | 6.8-7.2 |

**Table S3** Richness and diversity of AS and biofilm samples in IFAS and A/O system

| Samples              | Sep    | OTU  | Shannon | ACE      | Chao1    | Coverage | Simpson |
|----------------------|--------|------|---------|----------|----------|----------|---------|
|                      | num    | num  | index   | index    | index    |          |         |
| S0                   | 107278 | 9476 | 6.65    | 28607.32 | 19942.10 | 0.95     | 0.01    |
| AS <sub>A/O-1</sub>  | 65816  | 5037 | 6.38    | 12375.90 | 9380.77  | 0.96     | 0.01    |
| BS <sub>IFAS-1</sub> | 112923 | 8634 | 6.46    | 25185.21 | 17803.29 | 0.96     | 0.01    |
| AS <sub>IFAS-1</sub> | 55584  | 4523 | 6.38    | 10433.50 | 8245.25  | 0.96     | 0.01    |
| AS <sub>A/O-2</sub>  | 81854  | 8477 | 6.62    | 26076.22 | 17927.59 | 0.94     | 0.01    |
| BS <sub>IFAS-2</sub> | 68930  | 4469 | 6.30    | 10673.20 | 8278.06  | 0.97     | 0.01    |
| AS <sub>IFAS-2</sub> | 80455  | 8345 | 6.76    | 26217.92 | 18002.23 | 0.94     | 0.01    |

Note: S0 was inoculated sludge sample, AS<sub>A/O-1</sub> was activated sludge of A/O system at phase 1, BS<sub>IFAS-1</sub> was biofilm sample of IFAS system at phase 1, AS<sub>IFAS-1</sub> was activated sludge of IFAS system at phase 1, AS<sub>A/O-2</sub> was activated sludge of A/O system at phase 2, BS<sub>IFAS-2</sub> was biofilm sample of IFAS system at phase 2, AS<sub>IFAS-2</sub> was activated sludge of IFAS system at phase 2.

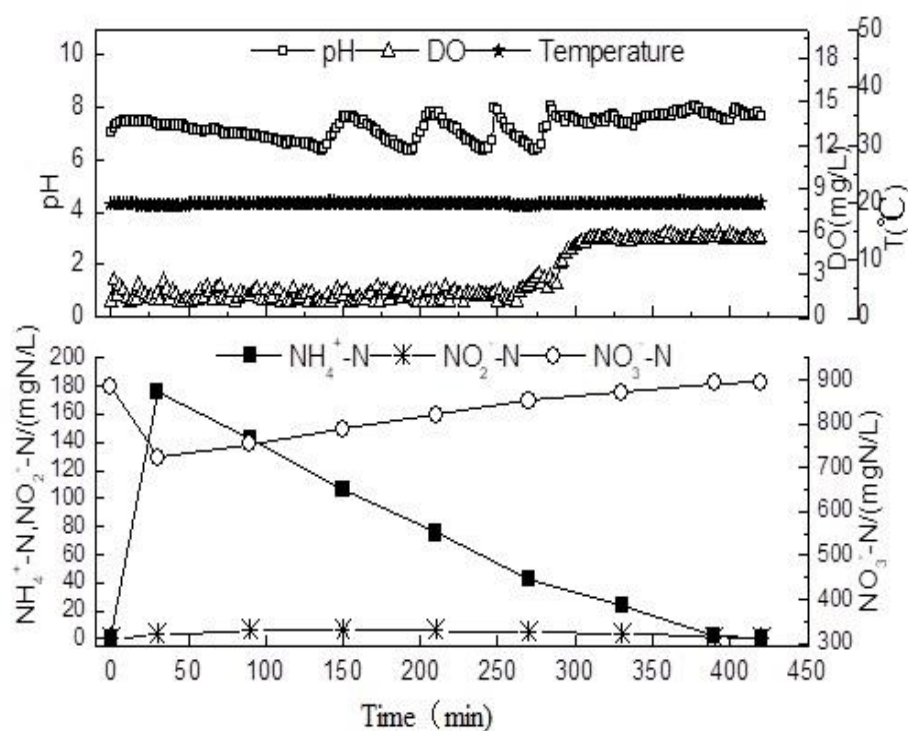

**Figure S1.** Curves of  $\text{NH}_4^+\text{-N}$ ,  $\text{NO}_3^-\text{-N}$ ,  $\text{NO}_2^-\text{-N}$ , pH, DO and temperature with time in a dynamic cycle of SBBR system

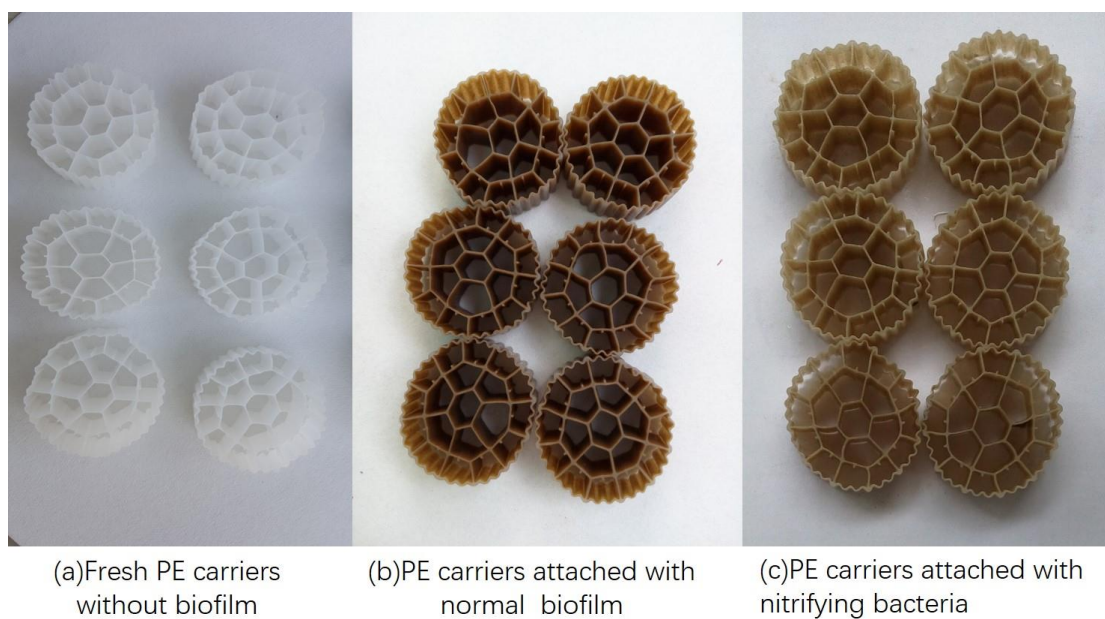

**Figure S2** Photos of fresh PE carriers, normal PE carriers and NBPE carriers
